# Supplementary material for: Fatal Nosocomial MDR TB Identified through Routine Genetic Analysis and Whole-Genome Sequencing
Source: PubMed Central journal article supplement (PMC4451893; doi:10.3201/eid2106.141903), 2015-06
Supplement: 14-1903-Techapp-s1.pdf [file 14-1903-Techapp-s1.pdf]

# Fatal Nosocomial MDR-TB Identified through Routine Genetic Analysis and Whole-Genome Sequencing

## Technical Appendix

Technical Appendix Table. Characteristics of 4 clinical isolates from patients with multidrug-resistant tuberculosis\*

| Patient | MIRU-VNTR                   | RIF | rpoB   | rpoB   | INH | katG  | mabA†   | PZA | pncA | EMB | embB  | STR | gidB‡      | gidB‡ |
|---------|-----------------------------|-----|--------|--------|-----|-------|---------|-----|------|-----|-------|-----|------------|-------|
| 1       | 224331432615324<br>33241328 | R   | L452P§ | H1028R | R   | S315T | -8(t>a) | R   | ins¶ | R   | M306V | S   | 130 bp del | R     |
| 2       | 224331432615324             | R   | L452P§ | H1028R | R   | S315T | -8(t>a) | R   | ins¶ | R   | M306V | -   | 130 bp del | R     |
| 3       | 22433143261532-<br>3324132- | S   | -      | -      | R   | S315T | -       | S   | -    | S   | -     | R   | -          | L26S  |
| 4       | 22433143261532-<br>33241328 | S   | -      | -      | R   | S315T | -       | S   | -    | S   | -     | R   | -          | L26S  |

\*EMB, ethambutol; INH, isoniazid; MIRU-VNTR, mycobacterial interspersed repetitive units-variable-number tandem-repeat; PZA, pyrazinamide; R, resistant; RIF, rifampin; S, sensitive; STR, streptomycin.

†Promoter mutation, cross-resistance to thioamides.

§*Escherichia coli* L533P

‡No resistance single-nucleotide polymorphisms in rpsL or rrs.

¶1 bp insertion in codon 153.

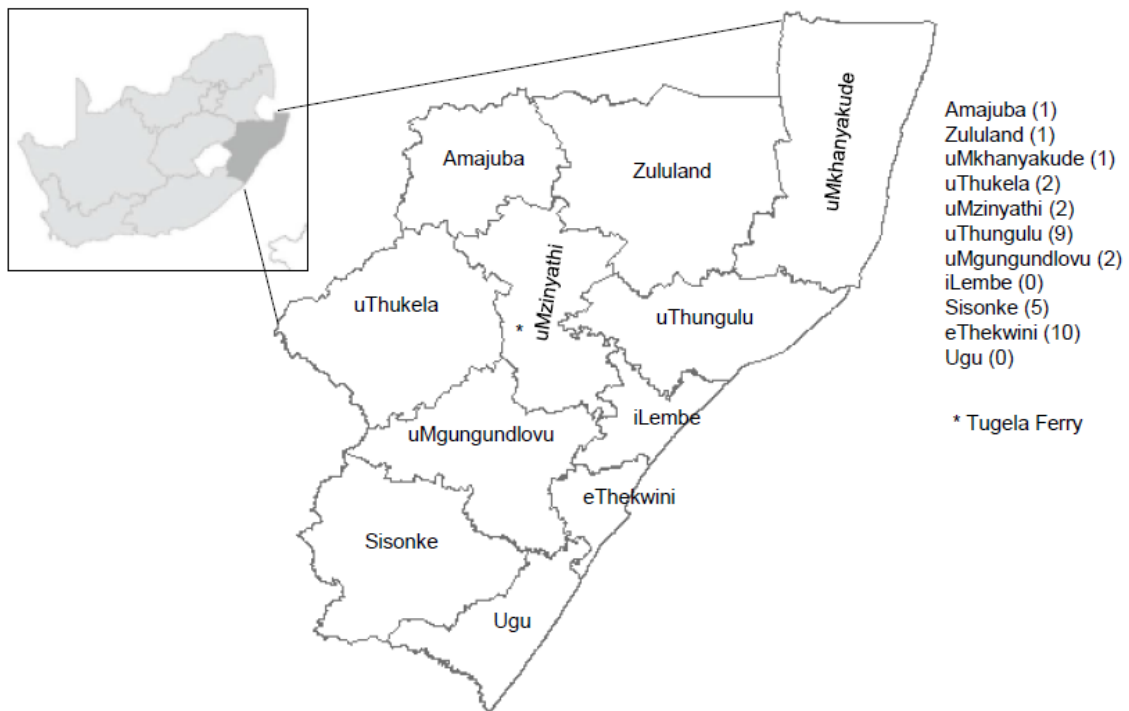

Technical Appendix Figure 1. Isolates sequenced from KwaZulu-Natal (KZN), South Africa, with number from each district sampled as part of KZNSUR project. Inset: Map of South Africa with KZN shaded

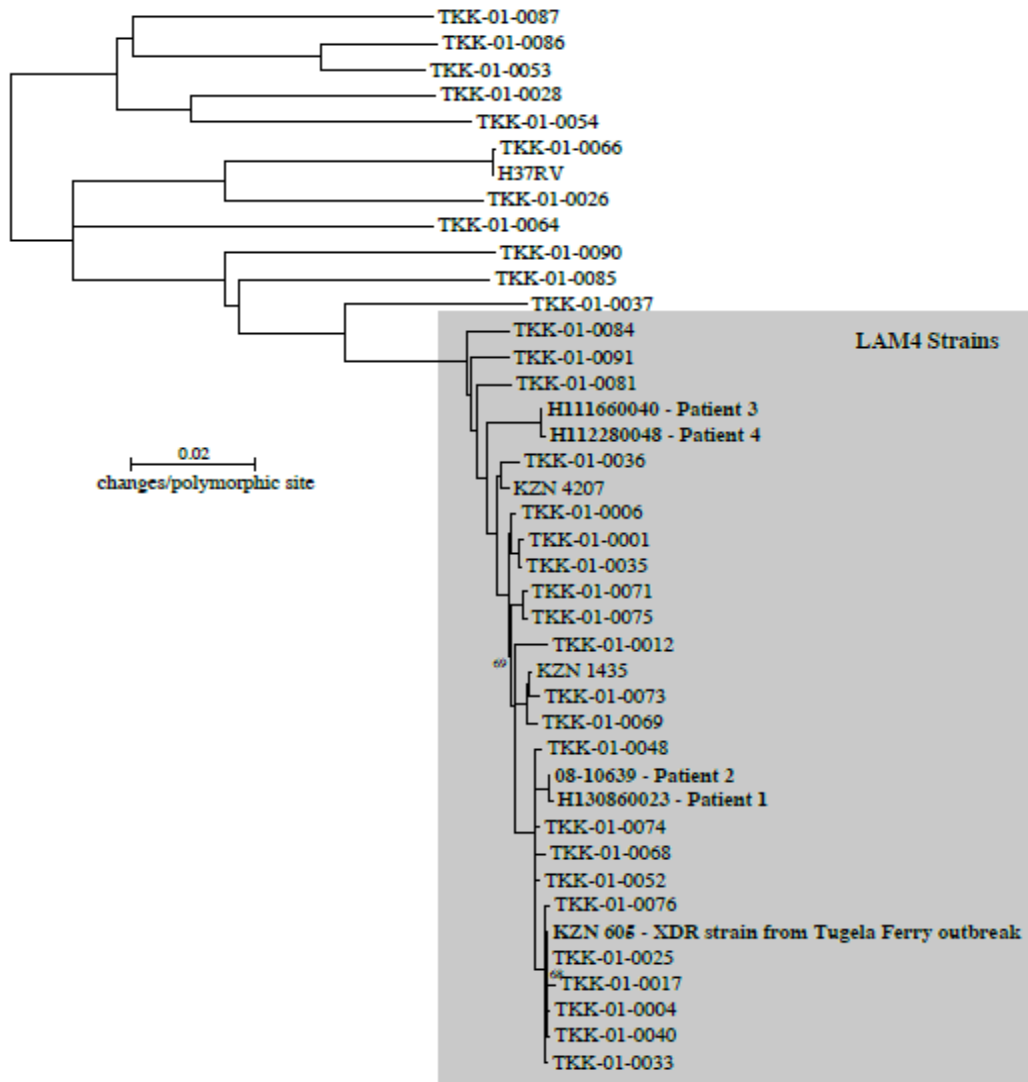

Technical Appendix Figure 2. Phylogenetic representation of isolates collected from the United Kingdom (patients 1–4) and KZN (33) Nodes with bootstrap values <80 are indicated. Sequencing data were submitted to the Sequence Read Archive with identifiers: PRJNA198182, PRJNA198181, PRJNA198148, PRJNA198149, PRJNA198124, PRJNA198185, PRJNA198180, PRJNA198186, PRJNA198176, PRJNA198108, PRJNA198103, PRJNA198130, PRJNA183521, PRJNA198168, PRJNA227150, PRJNA198163, PRJNA198172, PRJNA198106, PRJNA183515, PRJNA198122, PRJNA227148, PRJNA198135, PRJNA198128, PRJNA198147, PRJNA198169, PRJNA198143, PRJNA198113, PRJNA198167, PRJNA198170, PRJNA198131, PRJNA227149, PRJNA198179, PRJNA198132, PRJNA183519, PRJNA198161, PRJNA198159 ERS568284, ERS568285, ERS568286, ERS 568287
